# Supplementary material for: Inhibition of DDR1 enhances in vivo chemosensitivity in KRAS-mutant lung adenocarcinoma
Source: JCI journal article supplement (doi:10.1172/jci.insight.137869), 2020-08-05
Supplement: sd1 [file 1]

## Supplementary figures

### Supplementary Figure 1

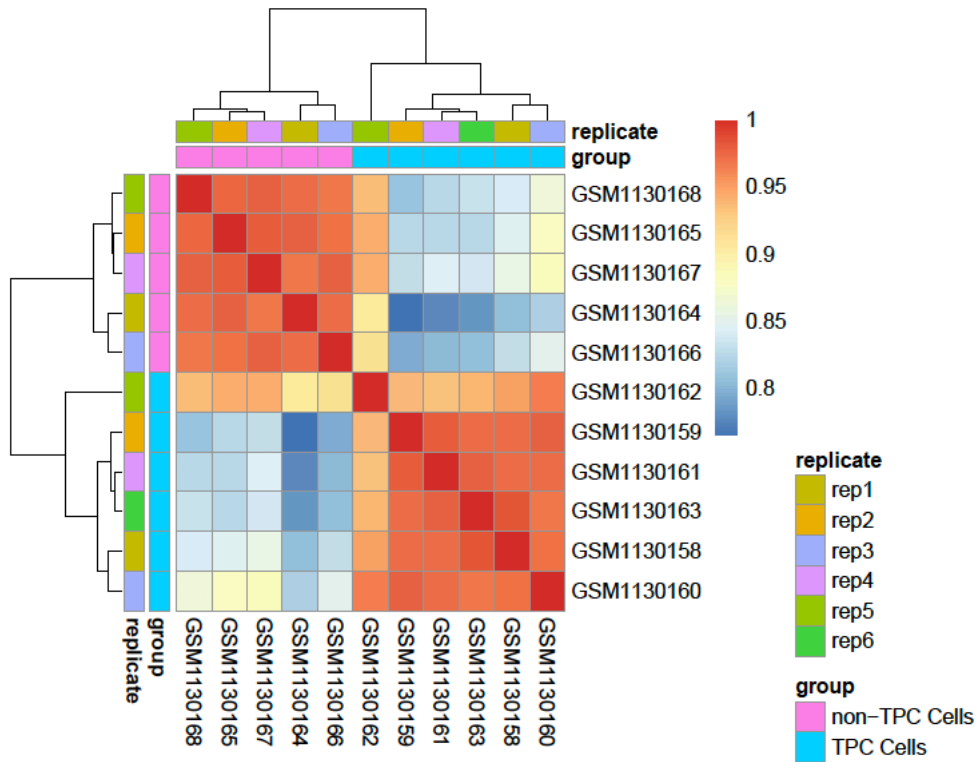

**Supp. Figure 1:** Heatmap showing Spearman's correlation of 11 samples from GSE46439 using 450 differentially expressed probes as previously defined (28). Color from blue to red represent the Spearman's correlation score from 0.7 to 1 respectively. The column and row annotations are identical. Group refers to TPC and non-TPC (tumour bulk) cells and the replicates are identified by different colors.

## Supplementary Figure 2

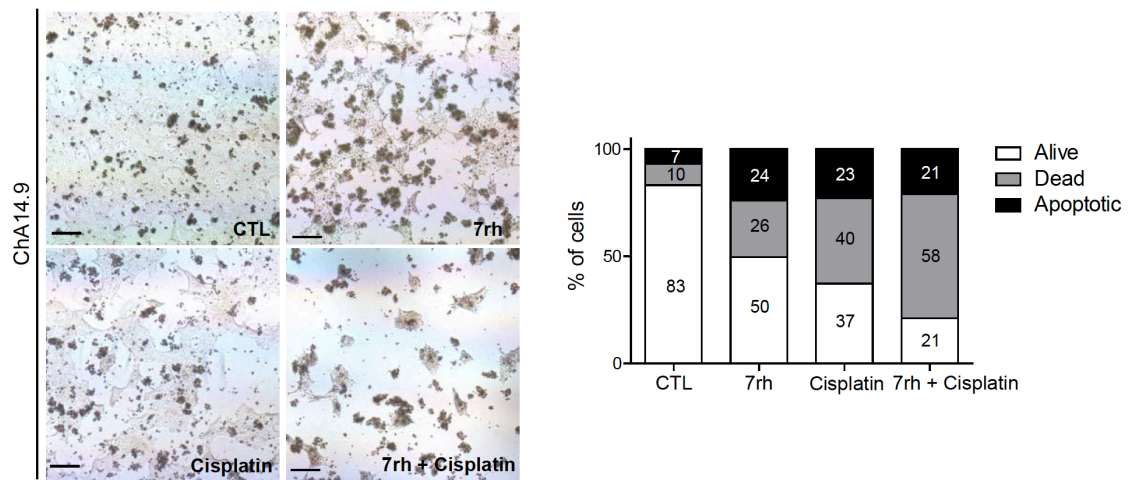

**Supp. Figure 2:** Murine KRas<sup>G12V</sup> ChA14.9 cell line was treated with either 7rh (0.8  $\mu$ M) or cisplatin (5  $\mu$ M) for 48 hrs in presence of collagen IV (50  $\mu$ g/ml). Left: representative pictures of the cultured cells following the indicated treatments. Scale bar, 100  $\mu$ m. Right: Quantification of apoptosis following the indicated treatments. Data are shown as the representative of 3 independent experiments.

### Supplementary Figure 3

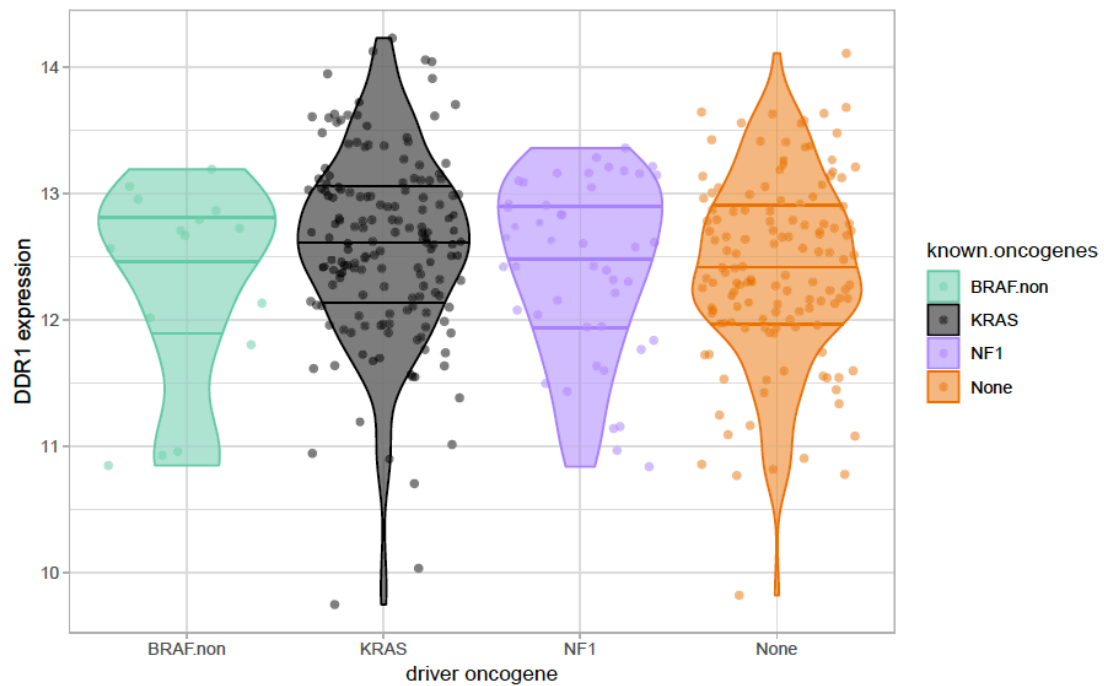

**Supp. Figure 3:** Violin plots showing the distribution of DDR1 expression in the indicated cohorts of LUAD patients obtained from TCGA. The x-axis groups the patients according to the indicated oncogenic driver. Horizontal bars indicate the first, second and third quartiles.
